# Supplementary material
Source: PubMed Central journal article supplement (PMC5491764)
Supplement: 10.1074_M117.792465_jbc.M117.792465-1.pdf [file 10.1074_M117.792465_jbc.M117.792465-1.pdf]

## SUPPLEMENTAL DATA

### Functional Analysis of Cytochrome P450 21A2 Variants Involved in Congenital Adrenal Hyperplasia

Chunxue Wang, Pradeep S. Pallan, Wei Zhang, Li Lei, Francis K. Yoshimoto, Michael R. Waterman, Martin Egli, and F. Peter Guengerich<sup>3</sup>

Department of Biochemistry, Vanderbilt University School of Medicine, Nashville, Tennessee  
37232-0146

*J. Biol. Chem.* **292**, xxx-xxx (2017)

#### CONTENTS

FIGURE S1. CD spectra of wild-type P450 21A2 and mutants plotted as a function of temperature.

FIGURE S2. Fe<sup>2+</sup>-CO v. Fe<sup>2+</sup> difference spectra of several variants of P450 21A2.

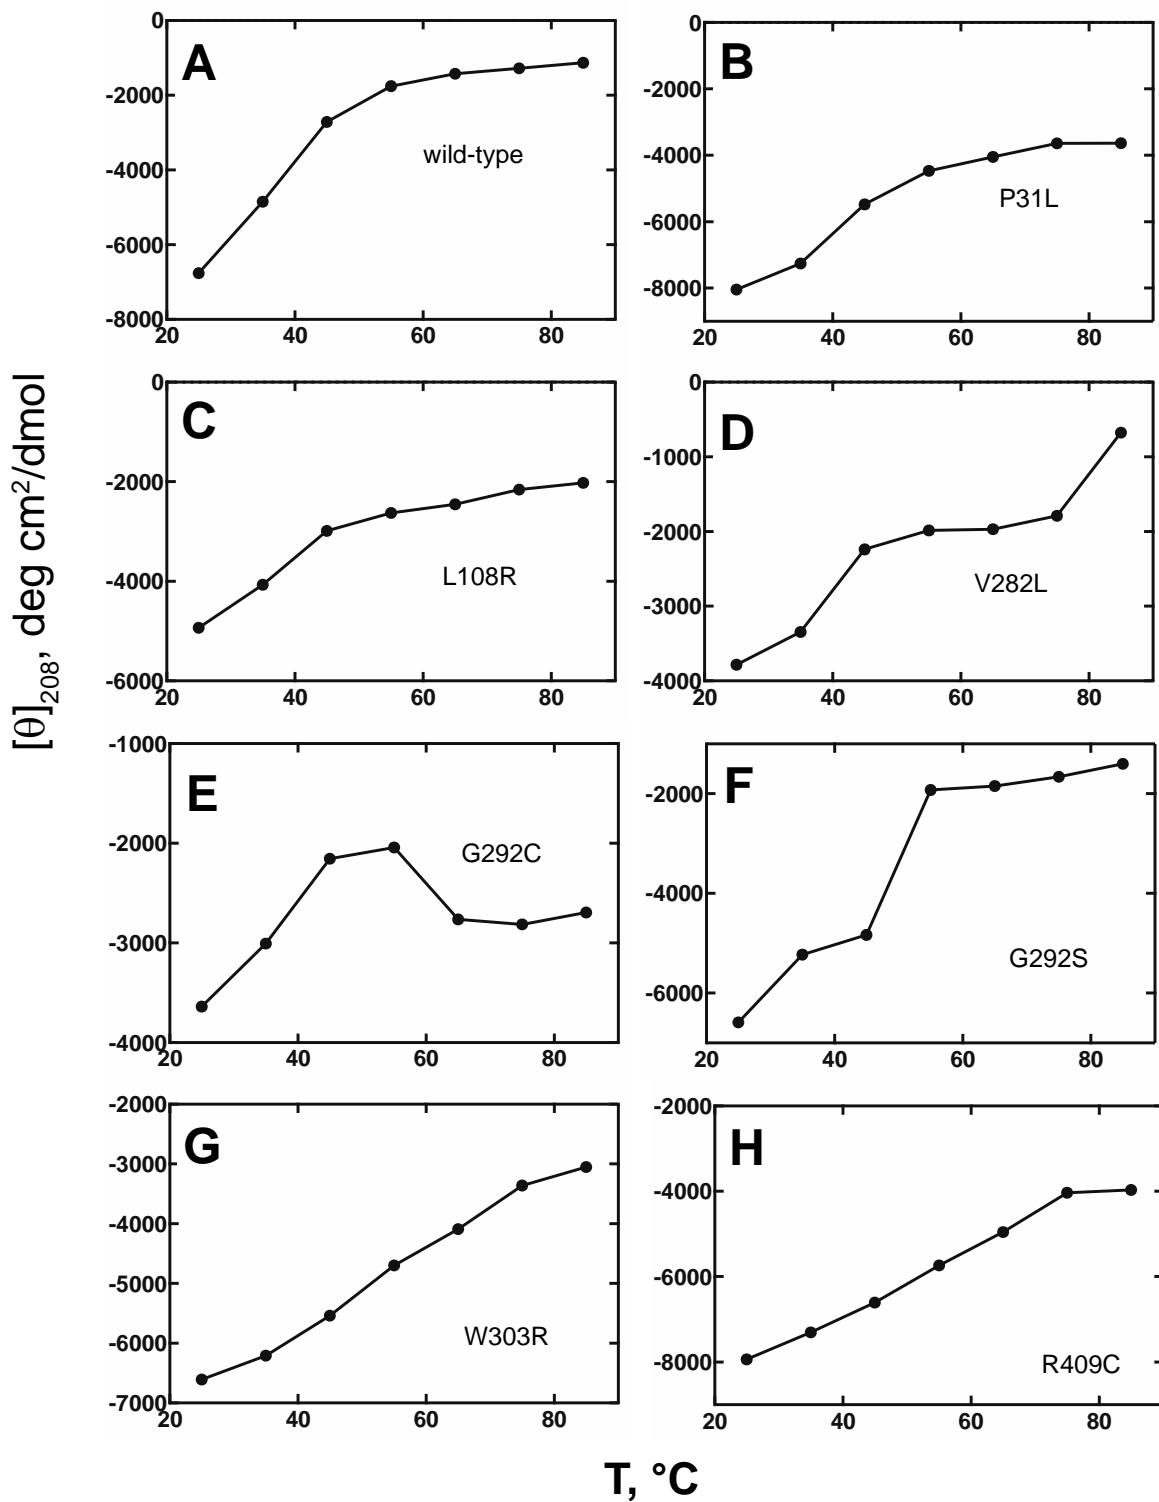

FIGURE S1. CD spectra of wild-type P450 21A2 and mutants plotted as a function of temperature. A, wild-type P450 21A2; B, P31L; C, L108R; D, V282L; E, G292C; F, G292S; G, W303R; H, R409C. See Fig. 5 for CD spectra at each temperature.

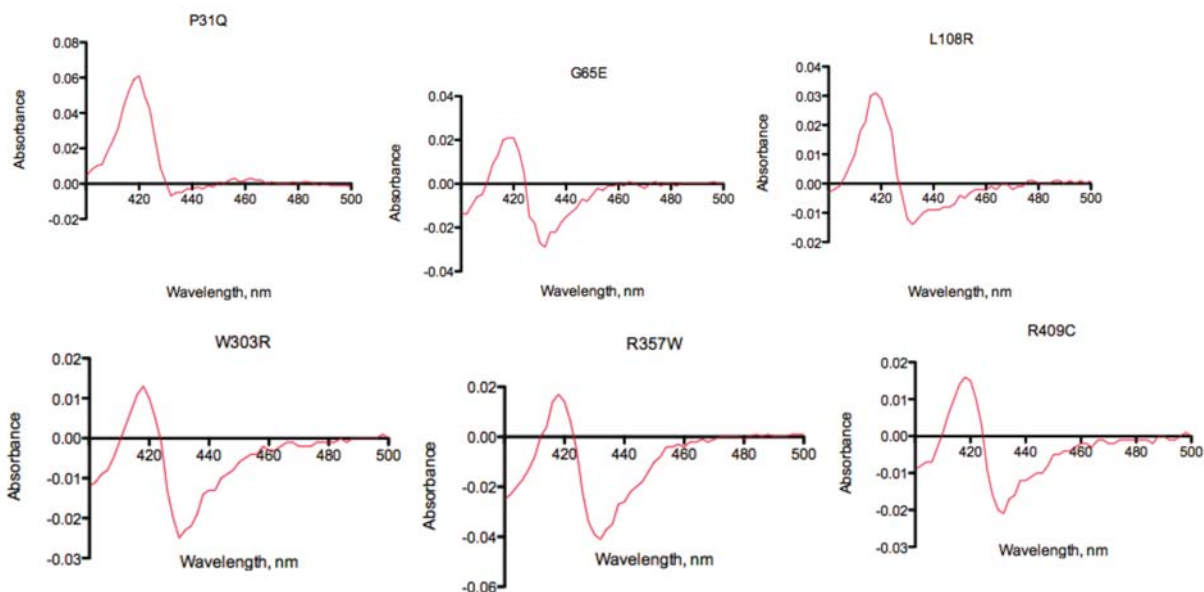

FIGURE S2.  $\text{Fe}^{2+}$ -CO v.  $\text{Fe}^{2+}$  difference spectra of several variants of P450 21A2 (in bacterial cells, not normalized for protein concentration). See text and Fig. 6 for methodology. Reduced P450-CO complex spectra of P450 variants were acquired in bacterial cells (Fig. 6). The presence of the 450 nm band is indicative of structurally-intact protein, and the band at 420 nm is indicative of cytochrome P420, a denatured form.
